# Supplementary material for: Regeneration of the cerebral cortex by direct chemical reprogramming of macrophages into neuronal cells in acute ischemic stroke
Source: Frontiers journal article supplement (doi:10.3389/fncel.2023.1225504), 2023-08-11
Supplement: Data_Sheet_1.PDF [file Data_Sheet_1.PDF]

## *Supplementary Material*

# **Regeneration of the cerebral cortex by direct chemical reprogramming of macrophages into neuronal cells in acute ischemic stroke**

**Itaru Ninomiya<sup>1\*</sup>, Akihide Koyama<sup>2</sup>, Yutaka Otsu<sup>1</sup>, Osamu Onodera<sup>1</sup>, Masato Kanazawa<sup>1\*</sup>**

<sup>1</sup>Brain Research Institute, Niigata University, Department of Neurology, Niigata, Japan

<sup>2</sup>Graduate School of Medical and Dental Science, Niigata University, Department of Legal Medicine, Niigata, Japan

**\* Correspondence:**

Itaru Ninomiya: [ininomiya@bri.niigata-u.ac.jp](mailto:ininomiya@bri.niigata-u.ac.jp)

Masato Kanazawa: [masa2@bri.niigata-u.ac.jp](mailto:masa2@bri.niigata-u.ac.jp)

## **1 Supplementary Table 1 Related to Experimental Procedures. Antibodies and Oligonucleotides**

| RESOURCE                                                       | SOURCE     | IDENTIFIER                         |
|----------------------------------------------------------------|------------|------------------------------------|
| Antibodies                                                     |            |                                    |
| Polyclonal rabbit anti-beta III Tubulin (TUJ1)                 | Abcam      | Cat#ab18207;<br>RRID:AB_444319     |
| Monoclonal mouse anti-TUJ1                                     | BioLegend  | Cat#801201;<br>RRID:AB_2313773     |
| Polyclonal rabbit anti-Doublecortin (DCX)                      | Abcam      | Cat#ab18723;<br>RRID:AB_732011     |
| Monoclonal mouse anti-DCX                                      | Santa Cruz | Cat#sc-271390;<br>RRID:AB_10610966 |
| Polyclonal rabbit anti-Microtubule-Associated Protein 2 (MAP2) | Millipore  | Cat#AB5622;<br>RRID:AB_91939       |

|                                                 |                 |                                    |
|-------------------------------------------------|-----------------|------------------------------------|
| Monoclonal mouse anti-MAP 2                     | Sigma-Aldrich   | Cat#M4403;<br>RRID:AB_477193       |
| Monoclonal rabbit anti-NeuN                     | Abcam           | Cat# ab177487;<br>RRID:AB_2532109  |
| Monoclonal mouse anti-NeuroD1                   | Abcam           | Cat#ab60704;<br>RRID:AB_943491     |
| Polyclonal rabbit anti-Iba1                     | Proteintech     | Cat#10904-1-AP;<br>RRID:AB_2224377 |
| Polyclonal Rabbit anti-CD206                    | Abcam           | Cat#ab64693;<br>RRID:AB_1523910    |
| Oligonucleotides                                |                 |                                    |
| Primer for MAP2 F:<br>GTCACTTGCAACCAGAAATTGGA   | Takara Bio Inc. | SetID:HA268080-F                   |
| Primer for MAP2 R:<br>GCTGCTGGAACTCAGCAGGTAA    | Takara Bio Inc. | SetID:HA268080-R                   |
| Primer for DCX F:<br>CGGAAGCATGGATGAACTGG       | Takara Bio Inc. | SetID:HA156128-F                   |
| Primer for DCX R:<br>CAGTTGGGATTGACATTCTTGGTG   | Takara Bio Inc. | SetID:HA156128-R                   |
| Primer for MYT1L F:<br>CCGTACGGAGGTGTGCAATTC    | Takara Bio Inc. | SetID:HA281776-F                   |
| Primer for MYT1L R:<br>GCAACATTATTGATCAGCCGTGAG | Takara Bio Inc. | SetID:HA281776-R                   |

|                                                 |                 |                  |
|-------------------------------------------------|-----------------|------------------|
| Primer for ASCL1 F:<br>GTCACAAGTCAGCGCCCAAG     | Takara Bio Inc. | SetID:HA140715-F |
| Primer for ASCL1 R:<br>TGTAGCCAAAGCCGCTGAAG     | Takara Bio Inc. | SetID:HA140715-R |
| Primer for BRN2 F:<br>ACACTGACGATCTCCACGCAGTA   | Takara Bio Inc. | SetID:HA152014-F |
| Primer for BRN2 R:<br>GAGGGTGTGGGACCCTAAATATGAC | Takara Bio Inc. | SetID:HA152014-R |
| Primer for NGN2 F:<br>GGCACAGGCCAAAGTCACAG      | Takara Bio Inc. | SetID:HA144604-F |
| Primer for NGN2 R:<br>CGATCCGAGCAGCACTAACAC     | Takara Bio Inc. | SetID:HA144604-R |
| Primer for CD11b F:<br>GCTGCCGGTGAAATATGCTG     | Takara Bio Inc. | SetID:HA261098-F |
| Primer for CD11b R:<br>TCTCTGAGGCCGTGAAGTTGA    | Takara Bio Inc. | SetID:HA261098-R |
| Primer for Iba1 F:<br>CAGGATGATGCTGGGCAAGA      | Takara Bio Inc. | SetID:HA298334-F |
| Primer for Iba1 R:<br>CCTTCAAATCAGGGCAACTCAGA   | Takara Bio Inc. | SetID:HA298334-R |
| Primer for NCAM F:<br>AATTTACCGCGGCAAGAACATC    | Takara Bio Inc. | SetID:HA278033-F |
| Primer for NCAM R:<br>CCTGGCTGGGAACAATATCCAC    | Takara Bio Inc. | SetID:HA278033-R |

|                                                 |                 |                  |
|-------------------------------------------------|-----------------|------------------|
| Primer for PU.1 F:<br>GCCCTATGACACGGATCTATACCAA | Takara Bio Inc. | SetID:HA102872-F |
| Primer for PU.1 R:<br>TCTCGGCGAAGCTCTCGAA       | Takara Bio Inc. | SetID:HA102872-R |
| Primer for CD68 F:<br>AGCAGGGTTGAGCAACTGGTG     | Takara Bio Inc. | SetID:HA070317-F |
| Primer for CD68 R:<br>AGCCAGCCTCATGGCTGAA       | Takara Bio Inc. | SetID:HA070317-R |

## 2 Supplementary Figure 1

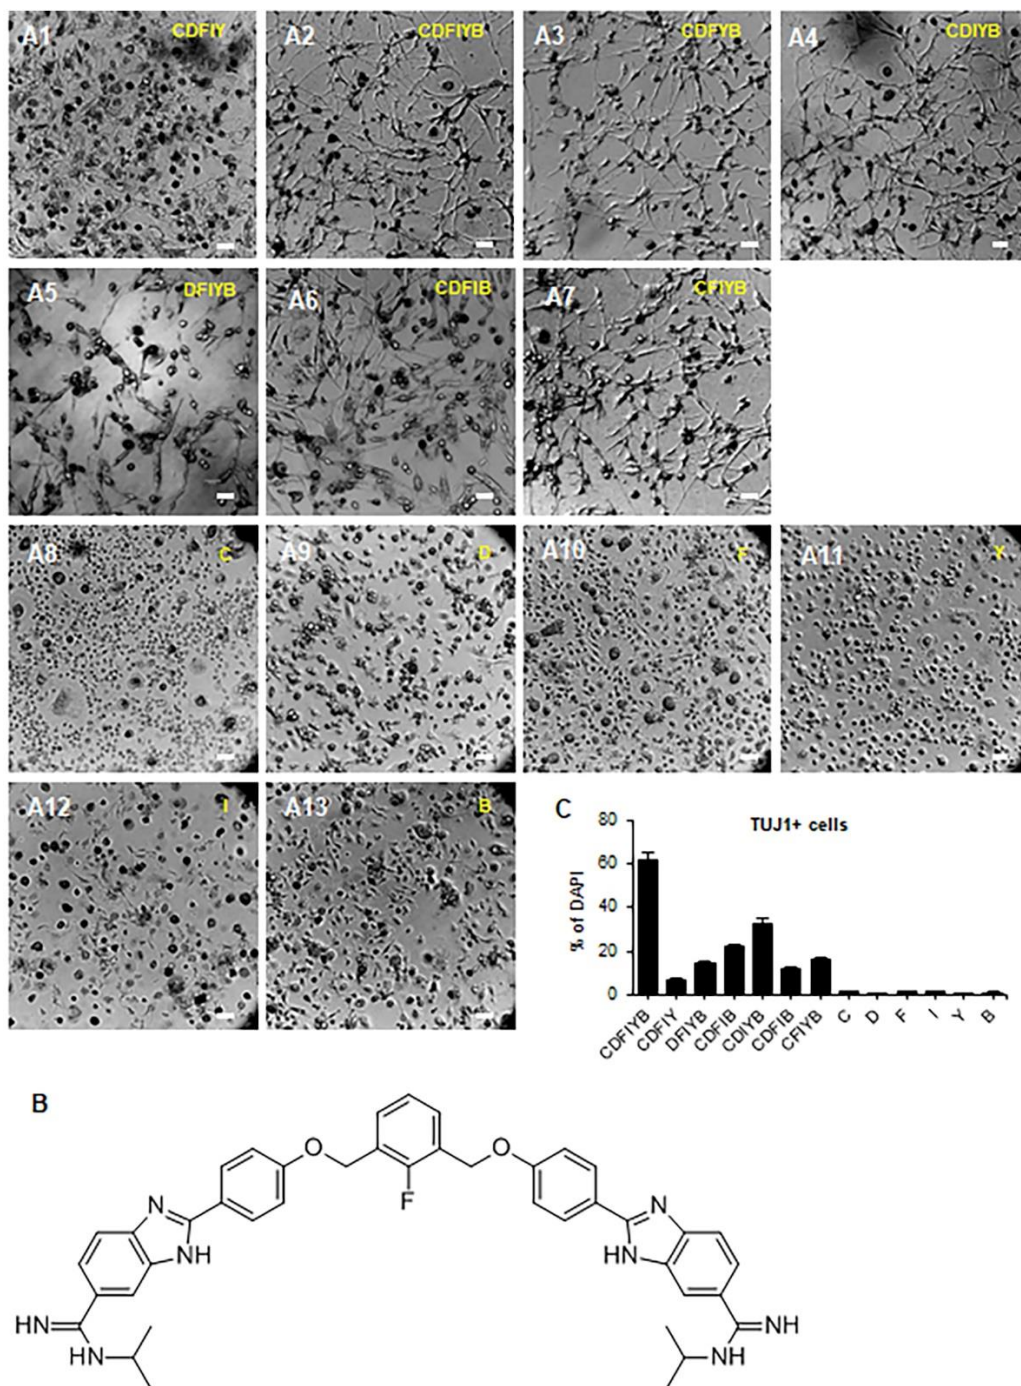

### Supplementary Figure 1. Further confirmation of neuronal conversion. Related to Figures 1.

(A1-A13) Representative morphological images of cells treated with the indicated small molecule(s) for 7 days. Yellow letters in the upper-right corner of each panel indicate small molecule(s). C, D, F, I, Y, and B, represent CHIR99021, Dorsomorphin, Forskolin, isoxazole-9 (ISX-9), 439 Y27632, and DB2313, respectively. Representative images of three independent experiments are shown. Scale bar = 50  $\mu$ m. (B) Chemical structures of DB2313. (C) Quantification of conversion efficiency on Day 7 using the indicated small molecule(s). Mean  $\pm$  SEM, n = 3 independent experiments. SEM, standard error of mean.



**Supplementary Figure 2. Further analysis of neuronal conversion process. Related to Figure 2.**

(A) Volcano plot of 21448 genes with log<sub>2</sub> ratio of expression levels of human cerebral cortex/Day-0-macrophages (x-axis) and the  $-\log_{10}$  of the corresponding significance value (p value, y-axis); four-fold changes (vertical lines), significance cutoff  $p = 0.05$  (horizontal line). Genes significantly enhanced in the cerebral cortex are shown in blue (CEGs) and those enhanced in Day 0 macrophages (MEGs) are shown in red. (B) Volcano plot of MEGs (2418 genes) with log<sub>2</sub> ratio of expression levels of Day 7-CC6-cells/Day 0-macrophages (x-axis) and  $-\log_{10}$  of the corresponding significance value (p value, y-axis); two-fold changes (vertical lines), significance cutoff  $p = 0.05$  (horizontal line). (C) Volcano plot of CEGs (2148 genes) with log<sub>2</sub> ratio of expression levels of Day 7-CC6-cells/Day 0-macrophages (x-axis) and  $-\log_{10}$  of the corresponding significance value (p value, y-axis); two-fold changes (vertical lines), significance cutoff  $p = 0.05$  (horizontal line). (D) GO enrichment analysis of the group B genes classified in **Figure 2A**. (E) GO enrichment analysis of the group C genes classified in **Figure 2A**. The enriched categories shown were based on a cutoff p-value of false discovery rate (FDR)  $< 0.05$ . (F) Scatterplots comparing gene expression levels between Day 0 macrophages and Day 7 CC5 cells (left panel) or Day 7 CC6 cells (right panel). (G) RNA microarray analysis of representative microglia-specific enriched genes. Data are shown as fold-change versus Day 0 macrophages. \*\*\* FDR  $p$  value  $< 0.001$ . Representative MEGs are highlighted in red and representative CEGs in blue. Dashed line indicates a two-fold change. CEG, cortex-enriched genes; MEG, macrophage-enriched genes; GO, gene ontology.



## 4 Supplementary Figure 3

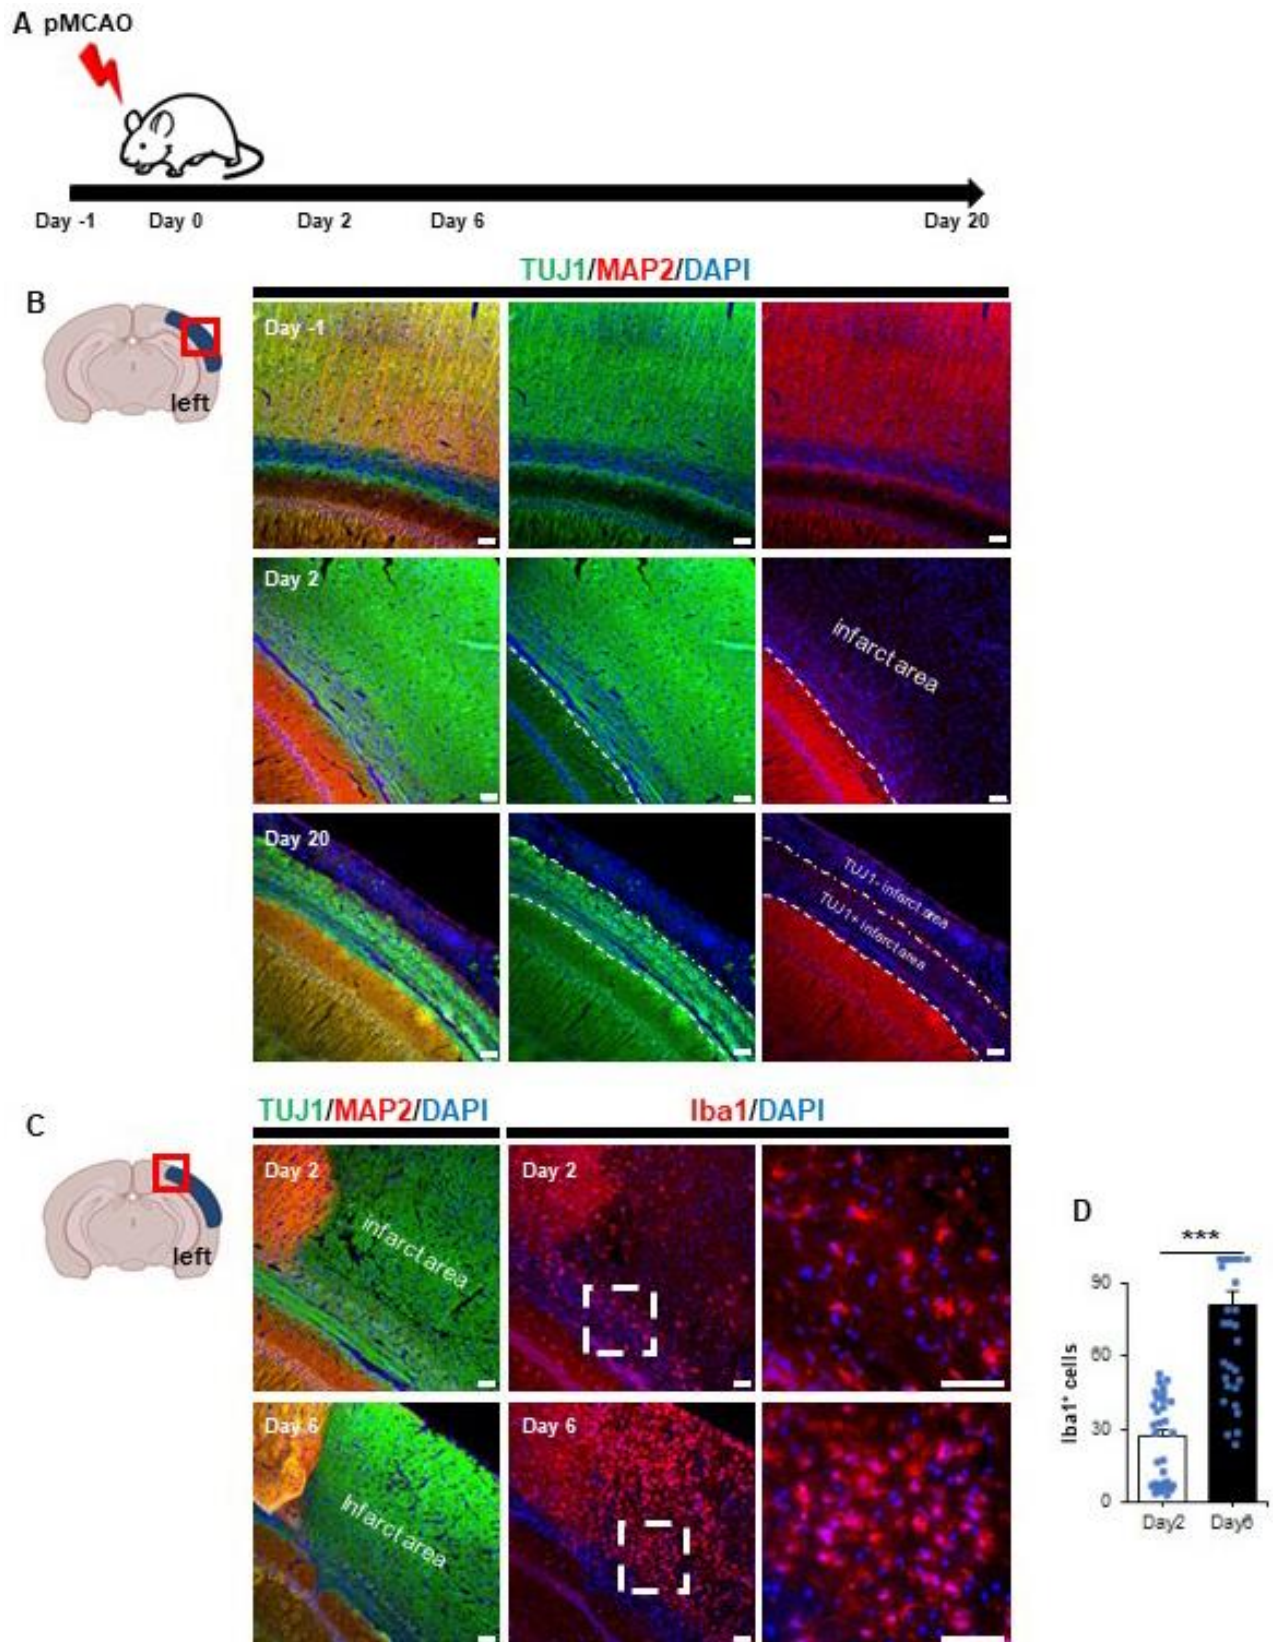



**Supplementary Figure 3. Histological changes over time in infarct area of mice. Related to Figure 3.**

(A) Schematic diagram showing the natural history of mice with permanent MCAO (pMCAO). Mice were sacrificed on days -1, 2, 6, and 20 for immunostaining. (B) Immunostaining for TUJ1 and MAP2 1 day before MCAO and 2 and 20 days after MCAO. One day before infarction, the normal cortical tissue indicates positive immunoreactivity for TUJ1 and MAP2 (upper panels). Two days after infarction, the cortical structures are damaged and MAP2 immunoreactivity is lost, but TUJ1 immunoreactivity is retained (middle panels). Twenty days after infarction, the cortex is contracted and TUJ1 immunoreactivity is lost in the outer infarct area (lower panels). Representative images (C) and quantitative analysis (D) show a significant increase in macrophage counts in the infarct area on Day 6 compared to Day 2. The total number of Iba1+ cells in the infarct area is quantified based on 10 randomly selected view fields in the infarct area for each sample. Mean  $\pm$  SEM, n = 3 independent experiments per n = six to seven views. \*\*\* p < 0.001, Scale bar, 50  $\mu$ m. MCAO, middle cerebral artery occlusion; TUJ1, beta III tubulin; MAP2, microtubule associated protein 2; SEM, standard error of mean.

## 5 Supplementary Figure 4

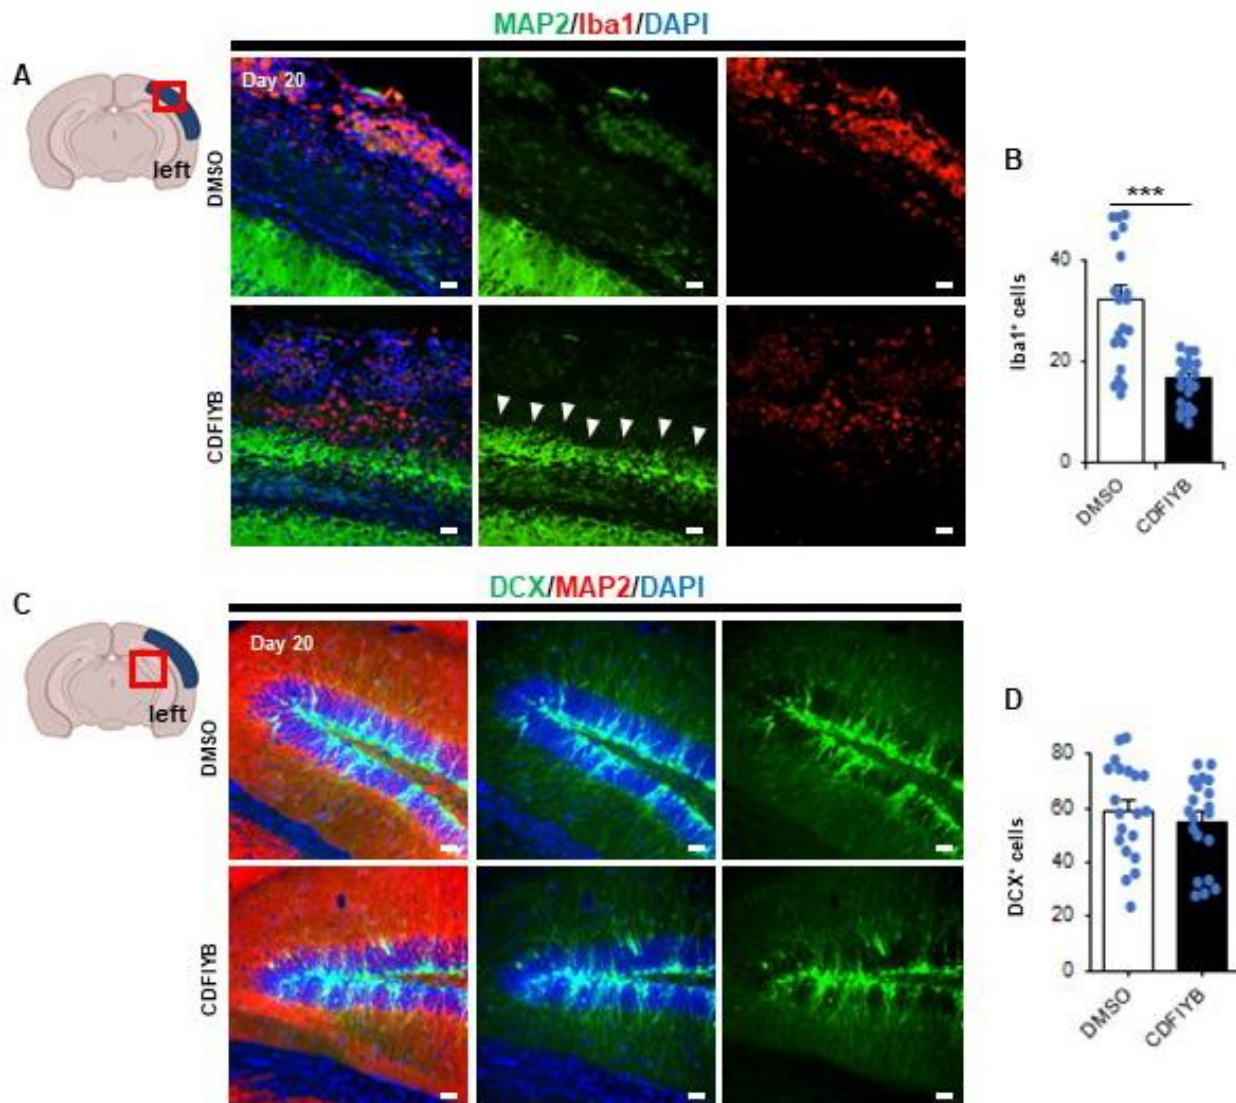

**Supplementary Figure 4. Further analysis of cerebral infarct area in mice treated with six drugs. Related to Figure 3.**

Representative images (A) and quantitative analyses (B) showing that compared to the vehicle control, the six drugs significantly decreased the macrophage number (Student's t test, \*\*\*p < 0.001, n = 3 mice). Arrowheads indicate a new neuronal layer generated by the treatment with the six drugs. Scale bar, 50  $\mu$ m. The total number of Iba1+ cells in the infarct area was quantified based on 6~7 randomly selected view fields in the infarct area for each sample. Representative images (C) and quantitative analyses (D) showing that compared to the vehicle control, small-molecule treatment did not significantly alter the number of newborn neurons in the hippocampal dentate gyrus (n = 3 mice). Scale bar, 50  $\mu$ m. The total number of DCX+ cells in the left hippocampal dentate gyrus is quantified based on 6~7 randomly selected view fields for each sample. DCX, doublecortin.
